# Supplementary material for: An approximation to the vibrational coupled-cluster method for CH-stretching of large molecules: application to naphthalene and anthracene
Source: Royal Society of Chemistry journal article supplement (doi:10.1039/d3cp01313h), 2023-01-01
Supplement: d3cp01313h1.pdf [file d3cp01313h1.pdf]

**Supporting Information:**  
**An approximation to vibrational coupled cluster method for CH-stretching of large molecules: Application to naphthalene and anthracene**

Nivedhitha Palanisamy<sup>1</sup>, Subrata Banik<sup>\*1a</sup>

<sup>1</sup> *Department of Chemistry, School of Chemical and Biotechnology,  
SASTRA Deemed University, Thanjavur 613401, Tamil Nadu, India*  
(Dated: June 10, 2023)

---

<sup>a</sup> subratachem@gmail.com

Table S1. The harmonic oscillator description for vibrations of naphthalene, calculated by using B3P86 functional with 6-311G(2d,2p) basis set. The numbers in the parenthesis are obtained using B3LYP functional and the same basis set.

| Mode No. | Symmetry | Frequency       | Intensity    | Approx. Description    |
|----------|----------|-----------------|--------------|------------------------|
| 1        | $a_g$    | 3206.0 (3190.3) | ia           | CH str                 |
| 2        | $a_g$    | 3180.4 (3165.7) | ia           | CH str                 |
| 3        | $a_g$    | 1629.6 (1612.1) | ia           | CCC bend               |
| 4        | $a_g$    | 1497.1 (1498.5) | ia           | HCC bend               |
| 5        | $a_g$    | 1419.1 (1390.6) | ia           | CC str+CCC bend        |
| 6        | $a_g$    | 1182.5 (1188.2) | ia           | HCC bend               |
| 7        | $a_g$    | 1051.8 (1045.5) | ia           | CC str                 |
| 8        | $a_g$    | 779.8 (773.6)   | ia           | CCC bend               |
| 9        | $a_g$    | 520.9 (520.5)   | ia           | CCC bend               |
| 10       | $a_u$    | 996.7 (995.3)   | ia           | Tors                   |
| 11       | $a_u$    | 849.4 (849.6)   | ia           | Tors                   |
| 12       | $a_u$    | 638.7 (637.1)   | ia           | Tors                   |
| 13       | $a_u$    | 186.1 (186.6)   | ia           | Tors                   |
| 14       | $b_{1g}$ | 963.1 (962.2)   | ia           | Tors                   |
| 15       | $b_{1g}$ | 727.7 (728.9)   | ia           | Tors                   |
| 16       | $b_{1g}$ | 395.6 (396.7)   | ia           | Tors                   |
| 17       | $b_{1u}$ | 3192.9 (3177.4) | 49.1 (63.3)  | CH str                 |
| 18       | $b_{1u}$ | 3174.7 (3159.7) | 6.2 (6.2)    | CH str                 |
| 19       | $b_{1u}$ | 1653.9 (1641.6) | 4.6 (4.8)    | CC str                 |
| 20       | $b_{1u}$ | 1422.2 (1426.5) | 2.0 (4.3)    | HCC bend               |
| 21       | $b_{1u}$ | 1290.9 (1291.3) | 6.4 (6.4)    | CCC bend+HCC bend      |
| 22       | $b_{1u}$ | 1153.0 (1154.5) | 5.0 (3.9)    | CCC bend               |
| 23       | $b_{1u}$ | 810.6 (811.1)   | 0.2 (0.3)    | CC str+CCC bend        |
| 24       | $b_{1u}$ | 363.3 (366.5)   | 1.3 (1.4)    | CCC bend               |
| 25       | $b_{2g}$ | 1002.7 (1001.4) | ia           | Tors                   |
| 26       | $b_{2g}$ | 900.3 900.1)    | ia           | Out plane bending      |
| 27       | $b_{2g}$ | 788.5 (788.0)   | ia           | Tors+Out plane bending |
| 28       | $b_{2g}$ | 478.4 (481.2)   | ia           | Tors+Out plane bending |
| 29       | $b_{2u}$ | 3205.1 (3189.1) | 37.8 (49.7)  | CH str                 |
| 30       | $b_{2u}$ | 3177.9 (3162.0) | 0.5 (0.9)    | CH str                 |
| 31       | $b_{2u}$ | 1560.6 (1551.0) | 9.7 (9.1)    | CC str                 |
| 32       | $b_{2u}$ | 1406.5 (1389.7) | 1.3 (1.0)    | CC str                 |
| 33       | $b_{2u}$ | 1240.4 (1231.7) | 1.2 (0.6)    | CC str                 |
| 34       | $b_{2u}$ | 1168.7 (1167.8) | 0.8 (0.8)    | HCC bend               |
| 35       | $b_{2u}$ | 1043.4 (1034.6) | 7.5 (6.6)    | CC str                 |
| 36       | $b_{2u}$ | 633.6 (638.1)   | 3.5 (3.4)    | CCC bend               |
| 37       | $b_{3g}$ | 3192.1 (3176.0) | ia           | CH str                 |
| 38       | $b_{3g}$ | 3173.6 (3157.7) | ia           | CH str                 |
| 39       | $b_{3g}$ | 1686.0 (1668.6) | ia           | CC str+CCC bend        |
| 40       | $b_{3g}$ | 1499.5 (1496.9) | ia           | HCC bend               |
| 41       | $b_{3g}$ | 1271.9 (1275.0) | ia           | HCC bend               |
| 42       | $b_{3g}$ | 1172.7 (1173.9) | ia           | CC str                 |
| 43       | $b_{3g}$ | 953.8 (956.6)   | ia           | CCC bend               |
| 44       | $b_{3g}$ | 518.1 (520.1)   | ia           | CCC bend               |
| 45       | $b_{3u}$ | 982.1 (980.5)   | 3.5 (3.0)    | Tors                   |
| 46       | $b_{3u}$ | 800.1 (799.7)   | 105.9 (98.9) | Tors                   |
| 47       | $b_{3u}$ | 485.3 (487.2)   | 19.2 (17.4)  | Tors+Out plane bending |
| 48       | $b_{3u}$ | 171.7 (172.7)   | 2.1 (1.9)    | Tors+Out plane bending |

<sup>a</sup> ia=inactive modes

Table S2. The harmonic oscillator description for vibrations of anthracene, calculated by using B3P86 functional and 6-311G(2d,2p) basis set. The numbers in the parenthesis are with B3LYP functional and 6-311G(2d,2p) basis set.

| Mode No. | Symmetry | Frequency       | Intensity   | Approx. Description             |
|----------|----------|-----------------|-------------|---------------------------------|
| 1        | $a_g$    | 3206.2 (3190.4) | ia          | CH str                          |
| 2        | $a_g$    | 3181.0 (3166.3) | ia          | CH str                          |
| 3        | $a_g$    | 3173.6 (3158.4) | ia          | CH str                          |
| 4        | $a_g$    | 1610.3 (1592.3) | ia          | CC str+CCC bend                 |
| 5        | $a_g$    | 1527.1 (1520.8) | ia          | CC str+CCC bend                 |
| 6        | $a_g$    | 1447.1 (1422.4) | ia          | CC str+CCC bend                 |
| 7        | $a_g$    | 1299.4 (1287.4) | ia          | CC str                          |
| 8        | $a_g$    | 1187.0 (1193.4) | ia          | HCC-bend                        |
| 9        | $a_g$    | 1037.9 (1029.8) | ia          | CC str                          |
| 10       | $a_g$    | 770.1 ( 763.8)  | ia          | CCC bend                        |
| 11       | $a_g$    | 639.6 ( 644.5)  | ia          | CCC bend                        |
| 12       | $a_g$    | 399.7 ( 398.3)  | ia          | CCC bend                        |
| 13       | $a_u$    | 997.8 (996.6)   | ia          | Tors                            |
| 14       | $a_u$    | 868.6 (868.5)   | ia          | Tors                            |
| 15       | $a_u$    | 761.3 (760.9)   | ia          | Tors+out plane bending          |
| 16       | $a_u$    | 505.0 (507.6)   | ia          | Tors                            |
| 17       | $a_u$    | 120.9 (121.2)   | ia          | CCC bend+HCC bend+Tors          |
| 18       | $b_{1g}$ | 974.8 (973.6)   | ia          | Tors                            |
| 19       | $b_{1g}$ | 770.6 (770.4)   | ia          | Tors                            |
| 20       | $b_{1g}$ | 483.4 (484.4)   | ia          | Tors+out plane bending          |
| 21       | $b_{1g}$ | 234.3 (235.4)   | ia          | CCC bend+Tors+out plane bending |
| 22       | $b_{1u}$ | 3193.6 (3177.9) | 51.6 (68.2) | CH str                          |
| 23       | $b_{1u}$ | 3175.6 (3160.8) | 10.0 (15.6) | CH str                          |
| 24       | $b_{1u}$ | 3171.4 (3156.2) | 10.4 (7.0)  | CH str                          |
| 25       | $b_{1u}$ | 1684.3 (1669.5) | 6.3 (6.4)   | CC str                          |
| 26       | $b_{1u}$ | 1496.3 (1491.2) | 1.9 (1.7)   | HCC-bend                        |
| 27       | $b_{1u}$ | 1347.4 (1342.9) | 6.5 (4.6)   | CC str                          |
| 28       | $b_{1u}$ | 1295.0 (1296.8) | 4.8 (5.7)   | HCC-bend                        |
| 29       | $b_{1u}$ | 1173.9 (1176.6) | 7.0 (5.5)   | HCC-bend                        |
| 30       | $b_{1u}$ | 921.6 (924.1)   | 1.7 (1.8)   | CCC bend                        |
| 31       | $b_{1u}$ | 663.4 (663.1)   | 0.7 (0.7)   | CCC bend                        |
| 32       | $b_{1u}$ | 234.9 (236.2)   | 1.3 (1.3)   | Tors                            |
| 33       | $b_{2g}$ | 998.3 (997.1)   | ia          | Tors                            |
| 34       | $b_{2g}$ | 919.3 (920.4)   | ia          | Tors                            |
| 35       | $b_{2g}$ | 845.2 (845.7)   | ia          | Tors                            |
| 36       | $b_{2g}$ | 787.5 (787.9)   | ia          | Tors+out plane bending          |
| 37       | $b_{2g}$ | 595.0 (594.0)   | ia          | Tors                            |
| 38       | $b_{2g}$ | 269.2 (269.8)   | ia          | Tors+out plane bending          |
| 39       | $b_{2u}$ | 3205.8 (3189.9) | 48.9 (64.3) | CH str                          |
| 40       | $b_{2u}$ | 3180.0 (3164.6) | 0.02 (0.02) | CH str                          |
| 41       | $b_{2u}$ | 1593.1 (1578.6) | 6.5 (5.8)   | CC str                          |
| 42       | $b_{2u}$ | 1488.7 (1489.5) | 2.4 (2.3)   | HCC bend                        |
| 43       | $b_{2u}$ | 1431.6 (1410.4) | 1.7 (0.7)   | CC str                          |
| 44       | $b_{2u}$ | 1392.1 (1374.6) | 4.2 (4.7)   | CC str+CCC bend                 |
| 45       | $b_{2u}$ | 1190.4 (1190.5) | 2.1 (1.3)   | CC str+CCC bend                 |
| 46       | $b_{2u}$ | 1160.4 (1156.3) | 1.6 (1.6)   | CC str+CCC bend                 |
| 47       | $b_{2u}$ | 1032.7 (1024.5) | 6.8 (5.9)   | CC str                          |
| 48       | $b_{2u}$ | 827.3 ( 820.1)  | 0.0 (0.1)   | CC str                          |
| 49       | $b_{2u}$ | 616.6 ( 619.0)  | 8.5 (8.3)   | CCC bend                        |
| 50       | $b_{3g}$ | 3193.4 (3177.6) | ia          | CH str                          |
| 51       | $b_{3g}$ | 3175.2 (3159.7) | ia          | CH str                          |
| 52       | $b_{3g}$ | 1683.4 (1665.4) | ia          | CC str                          |
| 53       | $b_{3g}$ | 1636.9 (1624.6) | ia          | CC str                          |
| 54       | $b_{3g}$ | 1418.4 (1422.8) | ia          | HCC bend                        |
| 55       | $b_{3g}$ | 1294.0 (1299.5) | ia          | HCC bend                        |
| 56       | $b_{3g}$ | 1209.4 (1213.9) | ia          | HCC bend                        |
| 57       | $b_{3g}$ | 1132.5 (1128.5) | ia          | HCC bend                        |
| 58       | $b_{3g}$ | 931.8 (933.7)   | ia          | CCC bend                        |
| 59       | $b_{3g}$ | 533.3 (537.2)   | ia          | CCC bend                        |
| 60       | $b_{3g}$ | 393.0 (397.0)   | ia          | CCC bend                        |
| 61       | $b_{3u}$ | 980.2 (978.9)   | 6.6 (5.8)   | Tors                            |
| 62       | $b_{3u}$ | 902.5 (902.6)   | 55.6 (50.9) | Tors                            |
| 63       | $b_{3u}$ | 740.0 (741.0)   | 74.8 (70.5) | Tors                            |
| 64       | $b_{3u}$ | 477.2 (479.1)   | 22.0 (20.0) | Out plane bend                  |
| 65       | $b_{3u}$ | 388.2 (388.6)   | 0.0 (0.0)   | Tors                            |
| 66       | $b_{3u}$ | 89.8 ( 90.5)    | 1.1 (0.9 )  | Tors                            |

<sup>a</sup> ia=inactive modes

Table S3. Comparison of effective frequencies from EHO against VSCF and VCCM for pyridine molecule.

| S.No | VSCF <sup>a</sup> | EHO <sup>b</sup> | VCCM                         |
|------|-------------------|------------------|------------------------------|
| 1    | 3094.6            | 3127.3           | 3043.4 , 3039.0 <sup>c</sup> |
| 2    | 3036.3            | 3102.9           | 3075.6                       |
| 3    | 3030.6            | 3077.6           | 2994.7                       |
| 4    | 1616.8            | 1621.1           | 1593.5                       |
| 5    | 1501.3            | 1503.1           | 1486.3                       |
| 6    | 1234.7            | 1236.5           | 1223.3                       |
| 7    | 1092.1            | 1094.0           | 1075.3                       |
| 8    | 1045.3            | 1046.0           | 1038.1                       |
| 9    | 1006.8            | 1007.3           | 1001.4                       |
| 10   | 611.9             | 612.1            | 606.8                        |
| 11   | 1021.2            | 1027.6           | 976.9                        |
| 12   | 922.5             | 933.0            | 864.9                        |
| 13   | 388.5             | 390.5            | 365.5                        |
| 14   | 1033.9            | 1040.5           | 981.6                        |
| 15   | 979.9             | 987.9            | 926.5                        |
| 16   | 772.8             | 774.3            | 750.2                        |
| 17   | 753.3             | 761.1            | 688.1                        |
| 18   | 417.3             | 418.6            | 404.0                        |
| 19   | 3046.0            | 3118.7           | 3016.3, 3089.6 <sup>d</sup>  |
| 20   | 3001.8            | 3074.8           | 3044.5                       |
| 21   | 1611.9            | 1617.2           | 1589.0                       |
| 22   | 1462.9            | 1464.8           | 1446.8                       |
| 23   | 1369.2            | 1371.4           | 1351.7                       |
| 24   | 1288.4            | 1296.1           | 1245.6                       |
| 25   | 1167.0            | 1170.1           | 1150.0                       |
| 26   | 1076.6            | 1078.6           | 1064.9                       |
| 27   | 665.4             | 665.6            | 661.5                        |

<sup>a</sup> VSCF results were obtained using 8 harmonic oscillator basis for each mode.

<sup>b</sup> Effective frequencies from the ground state EHO calculations

<sup>c</sup> Near equal contributions from 1<sub>1</sub>.

<sup>d</sup> Near equal contributions from 19<sub>1</sub>.

Table S4: Some of the intense transitions for different target set of pyridine in the frequency range 2900 to 3100  $\text{cm}^{-1}$ .

| Target set                                                                | Freq.                                                                                                                                                           | Final state                                                                                                                                                                                                     | Intensity |
|---------------------------------------------------------------------------|-----------------------------------------------------------------------------------------------------------------------------------------------------------------|-----------------------------------------------------------------------------------------------------------------------------------------------------------------------------------------------------------------|-----------|
| (10a <sub>1</sub> + 3a <sub>2</sub> + 5b <sub>1</sub> + 9b <sub>2</sub> ) | All modes                                                                                                                                                       | 0.23*17 <sub>1</sub> 16 <sub>1</sub> 4 <sub>1</sub> -0.16*1 <sub>1</sub> -0.05*22 <sub>1</sub> 16 <sub>1</sub> 12 <sub>1</sub> +0.05*2 <sub>1</sub>                                                             | 3.3       |
|                                                                           | 3039.0                                                                                                                                                          |                                                                                                                                                                                                                 |           |
|                                                                           | 3043.4                                                                                                                                                          | 0.50*17 <sub>1</sub> 16 <sub>1</sub> 4 <sub>1</sub> +0.17*1 <sub>1</sub> -0.03*24 <sub>1</sub> 16 <sub>1</sub> 13 <sub>1</sub> 10 <sub>1</sub> -0.03*2 <sub>1</sub>                                             | 2.4       |
|                                                                           | 2916.2                                                                                                                                                          | 0.43*22 <sub>1</sub> 5 <sub>1</sub> -0.15*23 <sub>1</sub> 4 <sub>1</sub> +0.10*26 <sub>1</sub> 15 <sub>2</sub> +0.07*20 <sub>1</sub>                                                                            | 4.0       |
|                                                                           | 3044.5                                                                                                                                                          | 0.21*20 <sub>1</sub> -0.12*22 <sub>1</sub> 4 <sub>1</sub> -0.10*7 <sub>1</sub> 12 <sub>1</sub> 5 <sub>1</sub> +0.08*17 <sub>1</sub> 13 <sub>1</sub> 12 <sub>1</sub>                                             | 6.9       |
| 3069.1                                                                    | 0.36*21 <sub>1</sub> 5 <sub>1</sub> -0.19*14 <sub>1</sub> 12 <sub>1</sub> 6 <sub>1</sub> -0.09*19 <sub>1</sub> +0.06*22 <sub>1</sub> 4 <sub>1</sub>             | 5.0                                                                                                                                                                                                             |           |
| (7a <sub>1</sub> + 3a <sub>2</sub> + 5b <sub>1</sub> + 7b <sub>2</sub> )  | 100c-150f                                                                                                                                                       | 0.26 * 2 <sub>1</sub> - 0.13 * 1 <sub>1</sub> + 0.11 * 5 <sub>2</sub> + 0.11 * 3 <sub>1</sub>                                                                                                                   | 8.3       |
|                                                                           | 3039.6                                                                                                                                                          |                                                                                                                                                                                                                 |           |
|                                                                           | 2929.2                                                                                                                                                          | 0.50 * 22 <sub>1</sub> 5 <sub>1</sub> - 0.19 * 23 <sub>1</sub> 4 <sub>1</sub> + 0.11 * 20 <sub>1</sub> - 0.03 * 19 <sub>1</sub>                                                                                 | 7.1       |
|                                                                           | 3052.3                                                                                                                                                          | 0.23 * 20 <sub>1</sub> - 0.16 * 22 <sub>1</sub> 4 <sub>1</sub> - 0.16 * 19 <sub>1</sub> - 0.09 * 11 <sub>1</sub> 13 <sub>1</sub> 12 <sub>1</sub> 8 <sub>1</sub>                                                 | 19.4      |
| 3085.9                                                                    | 0.40 * 22 <sub>1</sub> 4 <sub>1</sub> + 0.23 * 21 <sub>1</sub> 5 <sub>1</sub> - 0.20 * 19 <sub>1</sub> + 0.02 * 23 <sub>1</sub> 16 <sub>1</sub> 14 <sub>1</sub> | 4.3                                                                                                                                                                                                             |           |
| 100c-200f                                                                 | Same as 100c-150f set                                                                                                                                           |                                                                                                                                                                                                                 |           |
| (7a <sub>1</sub> + 3a <sub>2</sub> + 5b <sub>1</sub> + 8b <sub>2</sub> )  | 100c-250f                                                                                                                                                       | 0.27 * 2 <sub>1</sub> - 0.18 * 22 <sub>1</sub> 21 <sub>1</sub> + 0.13 * 3 <sub>1</sub> + 0.09 * 5 <sub>2</sub>                                                                                                  | 7.2       |
|                                                                           | 3038.3                                                                                                                                                          |                                                                                                                                                                                                                 |           |
|                                                                           | 2924.5                                                                                                                                                          | 0.52 * 22 <sub>1</sub> 5 <sub>1</sub> - 0.18 * 23 <sub>1</sub> 4 <sub>1</sub> + 0.10 * 20 <sub>1</sub> + 0.02 * 23 <sub>1</sub> 5 <sub>1</sub>                                                                  | 5.5       |
|                                                                           | 3049.4                                                                                                                                                          | 0.28 * 20 <sub>1</sub> - 0.21 * 22 <sub>1</sub> 4 <sub>1</sub> - 0.07 * 19 <sub>1</sub> - 0.07 * 17 <sub>1</sub> 13 <sub>1</sub> 12 <sub>1</sub> 11 <sub>1</sub>                                                | 16.7      |
| 3078.9                                                                    | 0.40 * 21 <sub>1</sub> 5 <sub>1</sub> + 0.23 * 22 <sub>1</sub> 4 <sub>1</sub> - 0.21 * 19 <sub>1</sub> - 0.02 * 16 <sub>1</sub> 12 <sub>1</sub> 5 <sub>1</sub>  | 6.5                                                                                                                                                                                                             |           |
| 100c-300f                                                                 | Same as 100c-250f set                                                                                                                                           |                                                                                                                                                                                                                 |           |
| (5a <sub>1</sub> + 3a <sub>2</sub> + 5b <sub>1</sub> + 6b <sub>2</sub> )  | 150c-150f                                                                                                                                                       | 0.23 * 2 <sub>1</sub> + 0.18 * 5 <sub>2</sub> - 0.17 * 1 <sub>1</sub> + 0.10 * 3 <sub>1</sub>                                                                                                                   | 8.3       |
|                                                                           | 3038.9                                                                                                                                                          |                                                                                                                                                                                                                 |           |
|                                                                           | 2931.9                                                                                                                                                          | 0.26 * 22 <sub>1</sub> 5 <sub>1</sub> - 0.19 * 17 <sub>1</sub> 16 <sub>1</sub> 15 <sub>1</sub> 13 <sub>1</sub> - 0.14 * 16 <sub>2</sub> 15 <sub>1</sub> 13 <sub>1</sub> - 0.10 * 23 <sub>1</sub> 4 <sub>1</sub> | 6.0       |
|                                                                           | 3047.9                                                                                                                                                          | 0.31 * 17 <sub>1</sub> 12 <sub>1</sub> 5 <sub>1</sub> - 0.13 * 19 <sub>1</sub> + 0.12 * 20 <sub>1</sub> - 0.08 * 18 <sub>1</sub> 16 <sub>1</sub> 15 <sub>1</sub> 12 <sub>1</sub>                                | 12.7      |
|                                                                           | 3091.8                                                                                                                                                          | 0.57 * 22 <sub>1</sub> 4 <sub>1</sub> - 0.14 * 19 <sub>1</sub> + 0.12 * 21 <sub>1</sub> 5 <sub>1</sub> + 0.04 * 23 <sub>1</sub> 16 <sub>1</sub> 14 <sub>1</sub>                                                 | 2.2       |
| 150c-200f                                                                 | Same as 150c-150f set                                                                                                                                           |                                                                                                                                                                                                                 |           |
| (5a <sub>1</sub> + 3a <sub>2</sub> + 5b <sub>1</sub> + 7b <sub>2</sub> )  | 150c-250f                                                                                                                                                       | 0.25 * 2 <sub>1</sub> - 0.18 * 1 <sub>1</sub> + 0.14 * 5 <sub>2</sub> + 0.09 * 3 <sub>1</sub>                                                                                                                   | 8.6       |
|                                                                           | 3038.6                                                                                                                                                          |                                                                                                                                                                                                                 |           |
|                                                                           | 2930.7                                                                                                                                                          | 0.38 * 22 <sub>1</sub> 5 <sub>1</sub> + 0.12 * 20 <sub>1</sub> - 0.12 * 23 <sub>1</sub> 4 <sub>1</sub> + 0.07 * 24 <sub>1</sub> 4 <sub>1</sub>                                                                  | 6.1       |
|                                                                           | 3050.2                                                                                                                                                          | 0.13 * 19 <sub>1</sub> - 0.13 * 20 <sub>1</sub> + 0.11 * 17 <sub>1</sub> 12 <sub>1</sub> 5 <sub>1</sub> + 0.11 * 17 <sub>1</sub> 13 <sub>1</sub> 12 <sub>1</sub> 11 <sub>1</sub>                                | 13.4      |
| 3087.2                                                                    | 0.49 * 22 <sub>1</sub> 4 <sub>1</sub> + 0.19 * 21 <sub>1</sub> 5 <sub>1</sub> - 0.17 * 19 <sub>1</sub> - 0.03 * 16 <sub>1</sub> 12 <sub>1</sub> 5 <sub>1</sub>  | 3.2                                                                                                                                                                                                             |           |
| (6a <sub>1</sub> + 3a <sub>2</sub> + 5b <sub>1</sub> + 6b <sub>2</sub> )  | 150c-300f                                                                                                                                                       | 0.27 * 2 <sub>1</sub> - 0.13 * 1 <sub>1</sub> + 0.12 * 5 <sub>2</sub> + 0.12 * 3 <sub>1</sub>                                                                                                                   | 8.5       |
|                                                                           | 3039.0                                                                                                                                                          |                                                                                                                                                                                                                 |           |
|                                                                           | 2930.6                                                                                                                                                          | 0.25 * 22 <sub>1</sub> 5 <sub>1</sub> - 0.14 * 17 <sub>1</sub> 16 <sub>1</sub> 15 <sub>1</sub> 13 <sub>1</sub> - 0.09 * 16 <sub>2</sub> 15 <sub>1</sub> 13 <sub>1</sub> - 0.07 * 23 <sub>1</sub> 4 <sub>1</sub> | 3.2       |
|                                                                           | 3050.9                                                                                                                                                          | 0.21 * 20 <sub>1</sub> - 0.14 * 19 <sub>1</sub> - 0.13 * 22 <sub>1</sub> 4 <sub>1</sub> - 0.10 * 17 <sub>1</sub> 13 <sub>1</sub> 12 <sub>1</sub> 11 <sub>1</sub>                                                | 17.8      |
| 3085.9                                                                    | 0.45 * 22 <sub>1</sub> 4 <sub>1</sub> + 0.23 * 21 <sub>1</sub> 5 <sub>1</sub> - 0.19 * 19 <sub>1</sub> - 0.016 * 16 <sub>1</sub> 12 <sub>1</sub> 5 <sub>1</sub> | 3.9                                                                                                                                                                                                             |           |
| (5a <sub>1</sub> + 3a <sub>2</sub> + 4b <sub>1</sub> + 6b <sub>2</sub> )  | 200c-150f                                                                                                                                                       | 0.36 * 2 <sub>1</sub> + 0.13 * 5 <sub>2</sub> + 0.11 * 3 <sub>1</sub> + 0.11 * 23 <sub>1</sub> 21 <sub>1</sub>                                                                                                  | 7.6       |
|                                                                           | 3039.7                                                                                                                                                          |                                                                                                                                                                                                                 |           |
|                                                                           | 2931.1                                                                                                                                                          | 0.53 * 22 <sub>1</sub> 5 <sub>1</sub> + 0.16 * 20 <sub>1</sub> - 0.16 * 23 <sub>1</sub> 4 <sub>1</sub> - 0.05 * 19 <sub>1</sub>                                                                                 | 10.5      |
|                                                                           | 3048.0                                                                                                                                                          | 0.32 * 23 <sub>1</sub> 16 <sub>1</sub> 15 <sub>1</sub> - 0.12 * 19 <sub>1</sub> + 0.11 * 20 <sub>1</sub> + 0.07 * 17 <sub>1</sub> 12 <sub>1</sub> 5 <sub>1</sub>                                                | 11.6      |
| 3090.9                                                                    | 0.61 * 22 <sub>1</sub> 4 <sub>1</sub> - 0.16 * 19 <sub>1</sub> + 0.14 * 21 <sub>1</sub> 5 <sub>1</sub> + 0.01 * 22 <sub>1</sub> 17 <sub>1</sub> 15 <sub>1</sub> | 2.6                                                                                                                                                                                                             |           |
| 200c-200f                                                                 | Same as 200c-150f set                                                                                                                                           |                                                                                                                                                                                                                 |           |
| (5a <sub>1</sub> + 3a <sub>2</sub> + 4b <sub>1</sub> + 7b <sub>2</sub> )  | 200c-250f                                                                                                                                                       | 0.35*2 <sub>1</sub> -0.13*22 <sub>1</sub> 21 <sub>1</sub> +0.11*5 <sub>2</sub> +0.10*3 <sub>1</sub>                                                                                                             | 7.7       |
|                                                                           | 3039.5                                                                                                                                                          |                                                                                                                                                                                                                 |           |
|                                                                           | 2929.0                                                                                                                                                          | 0.52*22 <sub>1</sub> 5 <sub>1</sub> +0.14*20 <sub>1</sub> -0.13*23 <sub>1</sub> 4 <sub>1</sub> +0.04*24 <sub>1</sub> 4 <sub>1</sub>                                                                             | 7.6       |
|                                                                           | 3047.3                                                                                                                                                          | 0.19*23 <sub>1</sub> 16 <sub>1</sub> 15 <sub>1</sub> +0.19*17 <sub>1</sub> 12 <sub>1</sub> 5 <sub>1</sub> +0.12*20 <sub>1</sub> -0.11*19 <sub>1</sub>                                                           | 11.5      |
| 3086.1                                                                    | 0.49 * 22 <sub>1</sub> 4 <sub>1</sub> + 0.21 * 21 <sub>1</sub> 5 <sub>1</sub> - 0.18 * 19 <sub>1</sub> + 0.03 * 21 <sub>1</sub> 17 <sub>1</sub> 15 <sub>1</sub> | 3.4                                                                                                                                                                                                             |           |
| (6a <sub>1</sub> + 3a <sub>2</sub> + 4b <sub>1</sub> + 7b <sub>2</sub> )  | 200c-300f                                                                                                                                                       | 0.35 * 2 <sub>1</sub> - 0.19 * 22 <sub>1</sub> 21 <sub>1</sub> + 0.13 * 3 <sub>1</sub> + 0.09 * 5 <sub>2</sub>                                                                                                  | 6.7       |
|                                                                           | 3039.3                                                                                                                                                          |                                                                                                                                                                                                                 |           |
|                                                                           | 2929.2                                                                                                                                                          | 0.58 * 22 <sub>1</sub> 5 <sub>1</sub> - 0.13 * 23 <sub>1</sub> 4 <sub>1</sub> + 0.11 * 20 <sub>1</sub> + 0.04 * 24 <sub>1</sub> 4 <sub>1</sub>                                                                  | 6.3       |
|                                                                           | 3048.4                                                                                                                                                          | 0.42 * 17 <sub>1</sub> 12 <sub>1</sub> 5 <sub>1</sub> + 0.17 * 20 <sub>1</sub> - 0.10 * 19 <sub>1</sub> - 0.07 * 22 <sub>1</sub> 4 <sub>1</sub>                                                                 | 13.7      |
| 3084.7                                                                    | 0.39 * 22 <sub>1</sub> 4 <sub>1</sub> + 0.24 * 21 <sub>1</sub> 5 <sub>1</sub> - 0.16 * 19 <sub>1</sub> + 0.07 * 15 <sub>1</sub> 12 <sub>1</sub> 6 <sub>1</sub>  | 3.6                                                                                                                                                                                                             |           |
| (5a <sub>1</sub> + 2a <sub>2</sub> + 4b <sub>1</sub> + 5b <sub>2</sub> )  | 250c-150f                                                                                                                                                       | 0.72 * 1 <sub>1</sub> - 0.10 * 5 <sub>2</sub> - 0.04 * 22 <sub>1</sub> 21 <sub>1</sub> - 0.03 * 22 <sub>2</sub>                                                                                                 | 6.2       |
|                                                                           | 3047.2                                                                                                                                                          |                                                                                                                                                                                                                 |           |
|                                                                           | 2931.5                                                                                                                                                          | 0.53 * 22 <sub>1</sub> 5 <sub>1</sub> + 0.17 * 20 <sub>1</sub> - 0.17 * 23 <sub>1</sub> 4 <sub>1</sub> - 0.06 * 19 <sub>1</sub>                                                                                 | 11.6      |
|                                                                           | 3044.6                                                                                                                                                          | 0.30 * 20 <sub>1</sub> - 0.20 * 19 <sub>1</sub> + 0.14 * 23 <sub>1</sub> 4 <sub>1</sub> - 0.13 * 23 <sub>1</sub> 17 <sub>1</sub> 14 <sub>1</sub>                                                                | 25.0      |
| 3092.7                                                                    | 0.41 * 22 <sub>1</sub> 4 <sub>1</sub> + 0.34 * 22 <sub>1</sub> 17 <sub>1</sub> 15 <sub>1</sub> - 0.09 * 19 <sub>1</sub> + 0.08 * 21 <sub>1</sub> 5 <sub>1</sub> | 1.4                                                                                                                                                                                                             |           |
| 250c-200f                                                                 | Same as 250c-150f set                                                                                                                                           |                                                                                                                                                                                                                 |           |
| (5a <sub>1</sub> + 2a <sub>2</sub> + 4b <sub>1</sub> + 6b <sub>2</sub> )  | 250c-250f                                                                                                                                                       | 0.72 * 1 <sub>1</sub> - 0.10 * 5 <sub>2</sub> - 0.04 * 22 <sub>1</sub> 21 <sub>1</sub> - 0.03 * 22 <sub>2</sub>                                                                                                 | 6.2       |
|                                                                           | 3047.2                                                                                                                                                          |                                                                                                                                                                                                                 |           |
|                                                                           | 2931.5                                                                                                                                                          | 0.53 * 22 <sub>1</sub> 5 <sub>1</sub> + 0.17 * 20 <sub>1</sub> - 0.17 * 23 <sub>1</sub> 4 <sub>1</sub> - 0.06 * 19 <sub>1</sub>                                                                                 | 11.6      |
|                                                                           | 3044.6                                                                                                                                                          | 0.30 * 20 <sub>1</sub> - 0.20 * 19 <sub>1</sub> + 0.14 * 23 <sub>1</sub> 4 <sub>1</sub> - 0.13 * 23 <sub>1</sub> 17 <sub>1</sub> 14 <sub>1</sub>                                                                | 25.0      |
| 3085.0                                                                    | 0.39 * 22 <sub>1</sub> 4 <sub>1</sub> - 0.29 * 22 <sub>1</sub> 17 <sub>1</sub> 15 <sub>1</sub> - 0.14 * 19 <sub>1</sub> + 0.11 * 21 <sub>1</sub> 5 <sub>1</sub> | 2.5                                                                                                                                                                                                             |           |
| (6a <sub>1</sub> + 2a <sub>2</sub> + 4b <sub>1</sub> + 4b <sub>2</sub> )  | 250c-300f                                                                                                                                                       | 0.68 * 1 <sub>1</sub> - 0.07 * 5 <sub>2</sub> - 0.06 * 22 <sub>1</sub> 21 <sub>1</sub> - 0.03 * 5 <sub>1</sub> 4 <sub>1</sub>                                                                                   | 7.4       |
|                                                                           | 3048.3                                                                                                                                                          |                                                                                                                                                                                                                 |           |
|                                                                           | 2929.5                                                                                                                                                          | 0.60 * 22 <sub>1</sub> 5 <sub>1</sub> - 0.14 * 23 <sub>1</sub> 4 <sub>1</sub> + 0.12 * 20 <sub>1</sub> - 0.03 * 19 <sub>1</sub>                                                                                 | 7.4       |
|                                                                           | 3046.5                                                                                                                                                          | 0.42 * 20 <sub>1</sub> - 0.18 * 19 <sub>1</sub> + 0.14 * 23 <sub>1</sub> 4 <sub>1</sub> - 0.08 * 22 <sub>1</sub> 4 <sub>1</sub>                                                                                 | 29.4      |
| 3083.4                                                                    | 0.34 * 22 <sub>1</sub> 4 <sub>1</sub> - 0.32 * 22 <sub>1</sub> 17 <sub>1</sub> 15 <sub>1</sub> - 0.14 * 19 <sub>1</sub> + 0.13 * 21 <sub>1</sub> 5 <sub>1</sub> | 2.7                                                                                                                                                                                                             |           |

Continued on next page

| Target set                    | Freq.  | Final state                                                                    | Intensity |
|-------------------------------|--------|--------------------------------------------------------------------------------|-----------|
| 300c-150f                     | 3035.9 | $0.33 * 2_1 + 0.12 * 3_1 + 0.10 * 23_1 21_1 - 0.09 * 22_1 21_1$                | 3.6       |
| $(5a_1 + 2a_2 + 3b_1 + 5b_2)$ | 2931.0 | $0.53 * 22_1 5_1 + 0.18 * 20_1 - 0.17 * 23_1 4_1 - 0.07 * 19_1$                | 12.2      |
|                               | 3042.4 | $0.39 * 20_1 - 0.22 * 19_1 + 0.18 * 23_1 4_1 - 0.12 * 22_1 5_1$                | 30.4      |
|                               | 3090.5 | $0.68 * 22_1 4_1 - 0.15 * 19_1 + 0.09 * 21_1 5_1 - 0.05 * 22_1 17_1 15_1$      | 2.0       |
| 300c-200f                     |        | Same as 300c-150f set                                                          |           |
| 300c-250f                     | 3034.5 | $0.36 * 22_1 17_1 12_1 - 0.18 * 2_1 - 0.08 * 17_2 4_1 - 0.08 * 23_1 17_1 11_1$ | 2.7       |
| $(5a_1 + 2a_2 + 3b_1 + 6b_2)$ | 2929.2 | $0.52 * 22_1 5_1 0.14 * 20_1 - 0.14 * 23_1 4_1 + 0.07 * 24_1 17_1 15_1$        | 8.7       |
|                               | 3042.2 | $0.37 * 20_1 - 0.23 * 19_1 + 0.16 * 23_1 4_1 - 0.09 * 22_1 5_1$                | 30.2      |
|                               | 3085.5 | $0.61 * 22_1 4_1 - 0.19 * 19_1 + 0.13 * 21_1 5_1 - 0.03 * 22_1 17_1 15_1$      | 3.0       |
| 300c-300f                     | 3048.2 | $0.68 * 1_1 - 0.08 * 5_2 - 0.05 * 22_1 21_1 - 0.03 * 5_1 4_1$                  | 7.7       |
| $(6a_1 + 2a_2 + 3b_1 + 6b_2)$ | 2929.5 | $0.59 * 22_1 5_1 - 0.14 * 23_1 4_1 + 0.12 * 20_1 - 0.04 * 19_1$                | 7.6       |
|                               | 3044.8 | $0.38 * 20_1 - 0.15 * 24_1 12_2 - 0.14 * 19_1 + 0.13 * 23_1 4_1$               | 25.6      |
|                               | 3084.0 | $0.56 * 15_1 4_1 - 0.19 * 19_1 + 0.16 * 21_1 5_1 - 0.03 * 22_1 17_1 15_1$      | 3.4       |

Table S5. The vibrational modes included in the target sets for naphthalene

| Sr.No | Target Set | Modes included                                                                    |
|-------|------------|-----------------------------------------------------------------------------------|
| 1     | 250c-200f  | 1 2 3 4 5 10 11 14 15 17 18 19 20 25 26 29 30 31 32 37 38 39 40 45 46             |
| 2     | 200c-200f  | 1 2 3 4 5 10 11 14 15 17 18 19 20 25 26 29 30 31 32 37 38 39 40 45 46 47          |
| 3     | 200c-250f  | 1 2 3 4 5 10 11 14 15 17 18 19 20 21 25 26 29 30 31 32 33 37 38 39 40 41 45 46 47 |

Table S6. Comparison of VCCM results against VPT2 and experimental values for naphthalene. The VCCM calculations used 200c-200f target set. The VPT2 and experimental values are taken from Mackie et. al.[1]

| EXP |        |       | VPT2   |       |                                                                                                         |                                            | VCCM                             |                                                                                                   |                              |                                                                |
|-----|--------|-------|--------|-------|---------------------------------------------------------------------------------------------------------|--------------------------------------------|----------------------------------|---------------------------------------------------------------------------------------------------|------------------------------|----------------------------------------------------------------|
| ID  | Freq   | Rel.I | Freq   | Rel.I | Transition                                                                                              | Source                                     | Freq                             | Transition                                                                                        | Rel.I                        | Source                                                         |
| A   | 2963.8 | 0.20  | 2934.0 | 0.12  | 20 <sub>1</sub><br>41 <sub>1</sub>                                                                      | 17 <sub>1</sub><br>....                    | 2935.5<br>.....                  | 31 <sub>1</sub> 5 <sub>1</sub><br>.....                                                           | 0.03<br>....                 | 29 <sub>1</sub><br>.....                                       |
| B   | 2972.4 | 0.30  | 2944.6 | 0.021 | 18 <sub>1</sub> 17 <sub>1</sub><br>20 <sub>1</sub> 3 <sub>1</sub><br>5 <sub>1</sub> 19 <sub>1</sub>     | .....<br>18 <sub>1</sub><br>....           | 2961.4<br>2960.2<br>....         | 47 <sub>1</sub> 26 <sub>1</sub> 15 <sub>2</sub><br>18 <sub>1</sub><br>....                        | 0.52<br>0.28<br>.....        | 18 <sub>1</sub><br>18 <sub>1</sub><br>.....                    |
| C   | 2981.3 | 0.20  | 2956.4 | 0.032 | 29 <sub>1</sub><br>40 <sub>1</sub>                                                                      | 29 <sub>1</sub><br>30 <sub>1</sub><br>.... | 2966.5<br>....<br>....           | 47 <sub>1</sub> 26 <sub>1</sub> 3 <sub>1</sub><br>....<br>....                                    | 0.11<br>....<br>....         | 18 <sub>1</sub><br>.....<br>.....                              |
| C   | 2981.3 | 0.20  | 2956.6 | 0.02  | 41 <sub>1</sub><br>5 <sub>1</sub>                                                                       | ....<br>....                               | ....<br>....                     | ....<br>....                                                                                      | ....<br>.....                | .....<br>....                                                  |
| D   | 2989.0 | 0.28  | 2967.5 | 0.037 | 17 <sub>1</sub><br>18 <sub>1</sub><br>32 <sub>1</sub> 41 <sub>1</sub>                                   | 17 <sub>1</sub><br>....<br>....            | 2974.6<br>2973.5<br>....         | 32 <sub>1</sub> 3 <sub>1</sub><br>46 <sub>1</sub> 15 <sub>1</sub> 4 <sub>1</sub><br>....          | 0.38<br>0.06<br>....         | 29 <sub>1</sub> and 30 <sub>1</sub><br>.....<br>.....          |
| E   | 3014.0 | 0.30  | 2987.7 | 0.04  | 30 <sub>1</sub> 29 <sub>1</sub><br>20 <sub>1</sub> 39 <sub>1</sub>                                      | .....<br>....                              | 2978.9<br>....                   | 32 <sub>1</sub> 26 <sub>1</sub> 15 <sub>1</sub><br>....                                           | 0.36<br>....                 | 17 <sub>1</sub><br>.....                                       |
| F   | 3029.5 | 0.19  | 3016.6 | 0.074 | 18 <sub>1</sub><br>40 <sub>1</sub> 3 <sub>1</sub>                                                       | 18 <sub>1</sub><br>....                    | 2982.4<br>....                   | 17 <sub>1</sub><br>....                                                                           | 0.56<br>....                 | 17 <sub>1</sub> and 18 <sub>1</sub><br>.....                   |
| G   | 3034.5 | 0.15  | ....   | ....  | ....                                                                                                    | ....                                       | ....                             | ....                                                                                              | ....                         | .....                                                          |
| H   | 3039.5 | 0.19  | ....   | ....  | ....                                                                                                    | ....                                       | ....                             | ....                                                                                              | ....                         | .....                                                          |
| I   | 3042.3 | 0.29  | ....   | ....  | ....                                                                                                    | ....                                       | ....                             | ....                                                                                              | ....                         | .....                                                          |
| J   | 3043.8 | 0.35  | 3028.8 | 0.12  | 29 <sub>1</sub><br>30 <sub>1</sub><br>4 <sub>1</sub> 19 <sub>1</sub><br>20 <sub>1</sub> 39 <sub>1</sub> | 29 <sub>1</sub><br>....<br>....<br>....    | 3006.3<br>3005.4<br>....<br>.... | 47 <sub>2</sub> 14 <sub>1</sub> 10 <sub>1</sub><br>31 <sub>1</sub> 4 <sub>1</sub><br>....<br>.... | 0.02<br>0.41<br>....<br>.... | .....<br>29 <sub>1</sub> and 30 <sub>1</sub><br>.....<br>..... |
| K   | 3048.2 | 0.19  | .....  | ..... | .....                                                                                                   | ....                                       | ....                             | ....                                                                                              | ....                         | .....                                                          |
| L   | 3052.2 | 0.17  | .....  | ..... | .....                                                                                                   | ....                                       | ....                             | ....                                                                                              | ....                         | .....                                                          |
| M   | 3058.1 | 0.65  | 3046.5 | 0.16  | 29 <sub>1</sub><br>30 <sub>1</sub><br>4 <sub>1</sub> 19 <sub>1</sub>                                    | 29 <sub>1</sub><br>....<br>....            | 3039.3<br>....<br>....           | 40 <sub>1</sub> 31 <sub>1</sub><br>....<br>....                                                   | 0.89<br>....<br>....         | 17 <sub>1</sub><br>.....<br>.....                              |
| N   | 3060.5 | 0.54  | .....  | ..... | .....                                                                                                   | ....                                       | ....                             | ....                                                                                              | ....                         | .....                                                          |
| O   | 3065.2 | 0.99  | 3053.4 | 1     | 17 <sub>1</sub>                                                                                         | 17 <sub>1</sub>                            | 3037.7                           | 29 <sub>1</sub>                                                                                   | 1                            | 29 <sub>1</sub>                                                |
| P   | 3071.4 | 0.10  | .....  | ..... | .....                                                                                                   | ....                                       | 3046.0                           | 47 <sub>2</sub> 15 <sub>1</sub> 11 <sub>1</sub>                                                   | 0.02                         | .....                                                          |
| Q   | 3076.2 | 0.37  | .....  | ..... | .....                                                                                                   | ....                                       | ....                             | ....                                                                                              | ....                         | .....                                                          |
| R   | 3079.2 | 1.00  | 3061.9 | 0.28  | 29 <sub>1</sub><br>31 <sub>1</sub> 3 <sub>1</sub><br>4 <sub>1</sub> 19 <sub>1</sub>                     | 29 <sub>1</sub><br>....<br>....            | 3054.1<br>3056.3<br>....         | 39 <sub>1</sub> 32 <sub>1</sub><br>47 <sub>1</sub> 15 <sub>2</sub> 14 <sub>1</sub><br>....        | 0.45<br>0.04<br>....         | 17 <sub>1</sub><br>.....<br>.....                              |
| S   | 3092.6 | 0.21  | .....  | ..... | .....                                                                                                   | ....                                       | 3061.3                           | 39 <sub>1</sub> 32 <sub>1</sub>                                                                   | 0.14                         | 17 <sub>1</sub>                                                |
| T   | 3083.9 | 0.16  | 3068.7 | 0.069 | 18 <sub>1</sub> 17 <sub>1</sub><br>40 <sub>1</sub> 19 <sub>1</sub> 18 <sub>1</sub>                      | .....<br>....                              | ....<br>....                     | ....<br>....                                                                                      | ....<br>....                 | .....<br>.....                                                 |
| U   | 3100.2 | 0.45  | 3088.1 | 0.24  | 29 <sub>2</sub>                                                                                         | ....                                       | 3107.8                           | 40 <sub>1</sub> 19 <sub>1</sub>                                                                   | 0.06                         | 29 <sub>1</sub>                                                |
| V   | 3102.6 | 0.21  | ....   | ....  | 31 <sub>1</sub> 3 <sub>1</sub>                                                                          | ....                                       | ....                             | ....                                                                                              | ....                         | .....                                                          |
| W   | 3109.4 | 0.45  | ....   | ....  | ....                                                                                                    | .....                                      | 3144.7                           | 31 <sub>1</sub> 3 <sub>1</sub>                                                                    | 0.03                         | 30 <sub>1</sub>                                                |



Table S7. Comparison of VCCM results against VPT2 and experimental values for anthracene. The VCCM calculations used 200c-200f target set. The VPT2 and experimental values are taken from Mackie et. al.[1]

| EXP |        |       | VPT2   |       |                                 |                 | VCCM   |       |                                                                 |                                     |
|-----|--------|-------|--------|-------|---------------------------------|-----------------|--------|-------|-----------------------------------------------------------------|-------------------------------------|
| ID  | Freq   | Rel.I | Freq   | Rel.I | Transition                      | Source          | Freq   | Rel.I | Transition                                                      | Source                              |
| F   | 2973.2 | 0.1   | 2956.2 | 0.036 | 54 <sub>1</sub> 53 <sub>1</sub> | 22 <sub>1</sub> | .....  | ..... | .....                                                           | .....                               |
|     |        |       |        |       | 44 <sub>1</sub> 52 <sub>1</sub> | .....           | .....  | ..... | .....                                                           |                                     |
| G   | 2979.6 | 0.08  | 2958.6 | 0.028 | 54 <sub>1</sub> 53 <sub>1</sub> | 22 <sub>1</sub> | 2931.8 | 0.03  | 25 <sub>1</sub> 7 <sub>1</sub>                                  | 23 <sub>1</sub>                     |
|     |        |       |        |       | 44 <sub>1</sub> 52 <sub>1</sub> | 24 <sub>1</sub> | .....  | ..... | .....                                                           | .....                               |
| H   | 2992.5 | 0.07  | 2984.8 | 0.056 | 40 <sub>1</sub>                 | 39 <sub>1</sub> | .....  | ..... | .....                                                           | .....                               |
|     |        |       |        |       | 42 <sub>1</sub> 4 <sub>1</sub>  | .....           | .....  | ..... | .....                                                           |                                     |
|     |        |       |        |       | 43 <sub>1</sub> 52 <sub>1</sub> | .....           | .....  | ..... | .....                                                           |                                     |
| I   | 3011.8 | 0.07  | 2992.4 | 0.094 | 22 <sub>1</sub>                 | 23 <sub>1</sub> | 2943.3 | 0.02  | 25 <sub>1</sub> 7 <sub>1</sub>                                  | 23 <sub>1</sub>                     |
|     |        |       |        |       | 26 <sub>1</sub> 4 <sub>1</sub>  | .....           | .....  | ..... | .....                                                           |                                     |
| J   | 3022   | 0.3   | 3004.2 | 0.05  | 26 <sub>1</sub> 4 <sub>1</sub>  | 22 <sub>1</sub> | 2945.3 | 0.53  | 54 <sub>1</sub> 41 <sub>1</sub>                                 | 23 <sub>1</sub> and 22 <sub>1</sub> |
|     |        |       |        |       | 6 <sub>1</sub> 25 <sub>1</sub>  | .....           | .....  | ..... | .....                                                           |                                     |
|     |        |       |        |       | 54 <sub>1</sub> 52 <sub>1</sub> | .....           | .....  | ..... | .....                                                           |                                     |
| J   | 3022   | 0.3   | 3005   | 0.027 | 26 <sub>1</sub> 4 <sub>1</sub>  | 22 <sub>1</sub> | 2949.7 | 0.01  | 63 <sub>1</sub> 54 <sub>1</sub> 35 <sub>1</sub>                 | .....                               |
|     |        |       |        |       | 6 <sub>1</sub> 25 <sub>1</sub>  | .....           | .....  | ..... | .....                                                           |                                     |
|     |        |       |        |       | 54 <sub>1</sub> 52 <sub>1</sub> | .....           | .....  | ..... | .....                                                           |                                     |
| L   | 3030   | 0.25  | 3023.6 | 0.14  | 24 <sub>1</sub>                 | 24 <sub>1</sub> | 2968.8 | 0.09  | 26 <sub>1</sub> 5 <sub>1</sub>                                  | .....                               |
|     |        |       |        |       | 42 <sub>1</sub> 5 <sub>1</sub>  | .....           | .....  | ..... | .....                                                           |                                     |
| M   | 3033.7 | 0.2   | 3030.6 | 0.043 | 26 <sub>1</sub> 53 <sub>1</sub> | 39 <sub>1</sub> | 2975.9 | 0.07  | 52 <sub>1</sub> 27 <sub>1</sub>                                 | 40 <sub>1</sub>                     |
| N   | 3046.7 | 0.3   | 3046.3 | 0.19  | 39 <sub>1</sub>                 | 39 <sub>1</sub> | 2984.7 | 0.08  | 41 <sub>1</sub> 6 <sub>1</sub>                                  | .....                               |
|     |        |       |        |       | 40 <sub>1</sub>                 | .....           | .....  | ..... | .....                                                           |                                     |
| P   | 3055.4 | 0.54  | 3049.1 | 0.11  | 23 <sub>1</sub>                 | 23 <sub>1</sub> | 2996.7 | 0.05  | 42 <sub>1</sub> 36 <sub>2</sub>                                 | 40 <sub>1</sub>                     |
|     |        |       |        |       | 42 <sub>1</sub> 53 <sub>1</sub> | .....           | 2997.4 | 0.03  | 43 <sub>1</sub> 36 <sub>1</sub> 35 <sub>1</sub>                 | 40 <sub>1</sub>                     |
| Q   | 3062.3 | 0.45  | .....  | ..... | .....                           | .....           | .....  | ..... | .....                                                           |                                     |
| R   | 3065.3 | 0.72  | 3054.7 | 1     | 22 <sub>1</sub>                 | 22 <sub>1</sub> | 3012   | 0.43  | 53 <sub>1</sub> 43 <sub>1</sub>                                 | 22 <sub>1</sub>                     |
| S   | 3066.9 | 0.64  | .....  | ..... | .....                           | .....           | .....  | ..... | .....                                                           |                                     |
| T   | 3071.9 | 1     | 3060.7 | 0.44  | 39 <sub>1</sub>                 | 39 <sub>1</sub> | 3026.8 | 1.00  | 22 <sub>1</sub>                                                 | 22 <sub>1</sub>                     |
|     |        |       |        |       | 41 <sub>1</sub> 4 <sub>1</sub>  | .....           | 3026.7 | 0.73  | 39 <sub>1</sub>                                                 | 39 <sub>1</sub>                     |
|     |        |       |        |       | 26 <sub>1</sub> 52 <sub>1</sub> | .....           | .....  | ..... | .....                                                           | .....                               |
|     |        |       |        |       | 26 <sub>1</sub> 53 <sub>1</sub> | .....           | .....  | ..... | .....                                                           | .....                               |
| U   | 3077.8 | 0.4   | 3080.5 | 0.052 | 26 <sub>1</sub> 52 <sub>1</sub> | 39 <sub>1</sub> | 3037.6 | 0.05  | 63 <sub>1</sub> 41 <sub>1</sub>                                 | .....                               |
| V   | 3081.8 | 0.24  | 3080.8 | 0.088 | 42 <sub>1</sub> 52 <sub>1</sub> | 22 <sub>1</sub> | 3047.2 | 0.01  | 64 <sub>1</sub> 63 <sub>1</sub> 61 <sub>1</sub> 36 <sub>1</sub> | 36 <sub>1</sub>                     |
|     |        |       |        |       | .....                           | .....           | 3047.7 | 0.01  | 35 <sub>1</sub> 20 <sub>1</sub> 27 <sub>1</sub>                 | .....                               |
| W   | 3095.9 | 0.24  | .....  | ..... | .....                           | .....           | 3055.7 | 0.11  | 26 <sub>1</sub> 4 <sub>1</sub>                                  | .....                               |
|     |        |       |        |       |                                 |                 | 3056.1 | 0.02  | 63 <sub>1</sub> 35 <sub>1</sub> 5 <sub>1</sub>                  | .....                               |
| X   | 3109.6 | 0.32  | 3093.8 | 0.29  | 39 <sub>1</sub>                 | 39 <sub>1</sub> | 3084.8 | 0.08  | 53 <sub>1</sub> 26 <sub>1</sub>                                 | .....                               |
|     |        |       |        |       | 41 <sub>1</sub> 4 <sub>1</sub>  | .....           | 3084.8 | 0.04  | 53 <sub>1</sub> 26 <sub>1</sub>                                 | .....                               |

Table S8. The vibrational modes included in the target sets for anthracene

| Sr.No | Target Set | Modes included                                                                                                |
|-------|------------|---------------------------------------------------------------------------------------------------------------|
| 1     | 250c-200f  | 1 2 3 4 5 6 7 13 14 18 19 22 23 24 25 26 27 28 33 34 35 36 39 40 41 42 43 44 50 51 52 53 54 55 61 62 63 64    |
| 2     | 200c-200f  | 1 2 3 4 5 6 7 13 14 18 19 22 23 24 25 26 27 28 33 34 35 36 39 40 41 42 43 44 50 51 52 53 54 55 61 62 63 64    |
| 3     | 200c-250f  | 1 2 3 4 5 6 7 13 14 18 19 22 23 24 25 26 27 28 32 33 34 35 36 39 40 41 42 43 44 50 51 52 53 54 55 61 62 63 64 |

- 
- [1] C. J. Mackie, A. Candian, X. Huang, E. Maltseva, A. Petrignani, J. Oomens, W. J. Buma, T. J. Lee and A. G. G. M. Tielens, *J. Chem. Phys.*, 2015, **143**, 224314.
